# Supplementary material for: Identification of Chilling-Responsive Genes in Litchi chinensis by Transcriptomic Analysis Underlying Phytohormones and Antioxidant Systems
Source: MDPI journal article supplement (doi:10.3390/ijms23158424), 2022-07-29
Supplement: s1 [file s1]

Figure S1 Correlation analysis of biological replicates.

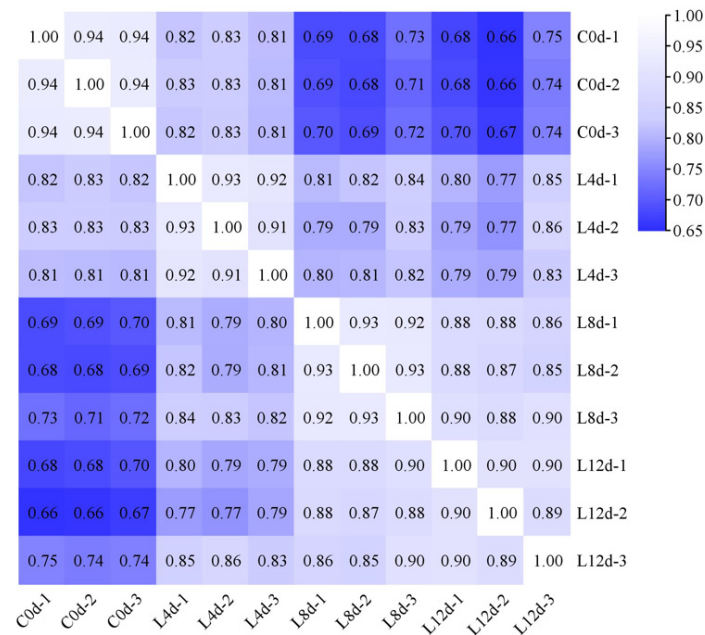

‘Huaizhi’ litchi trees were grown in a chamber at 22 °C/17 °C (day/night temperature, 12 h day and 12 h night) as normal temperature. Temperatures dropped from the normal one to 2 °C for 4 d, and then maintained at 2 °C for another 8 d. C 0 d, L 4 d, L 8 d, and L 12 d mean the leaves samples at 0 d, 4 d, 8 d, and 12 d of chilling stress.

Figure S2 The 20 top enriched GO terms of the DEGs in biological process (BP), cellular component (CC), and molecular function (MF) ontologies.

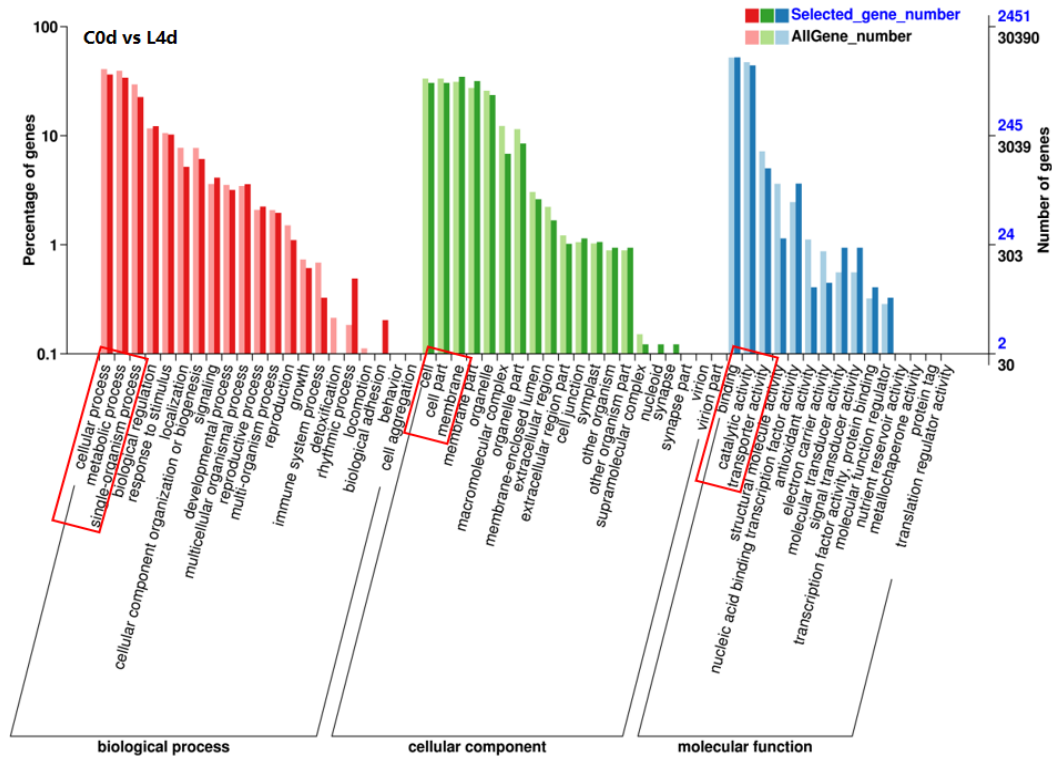

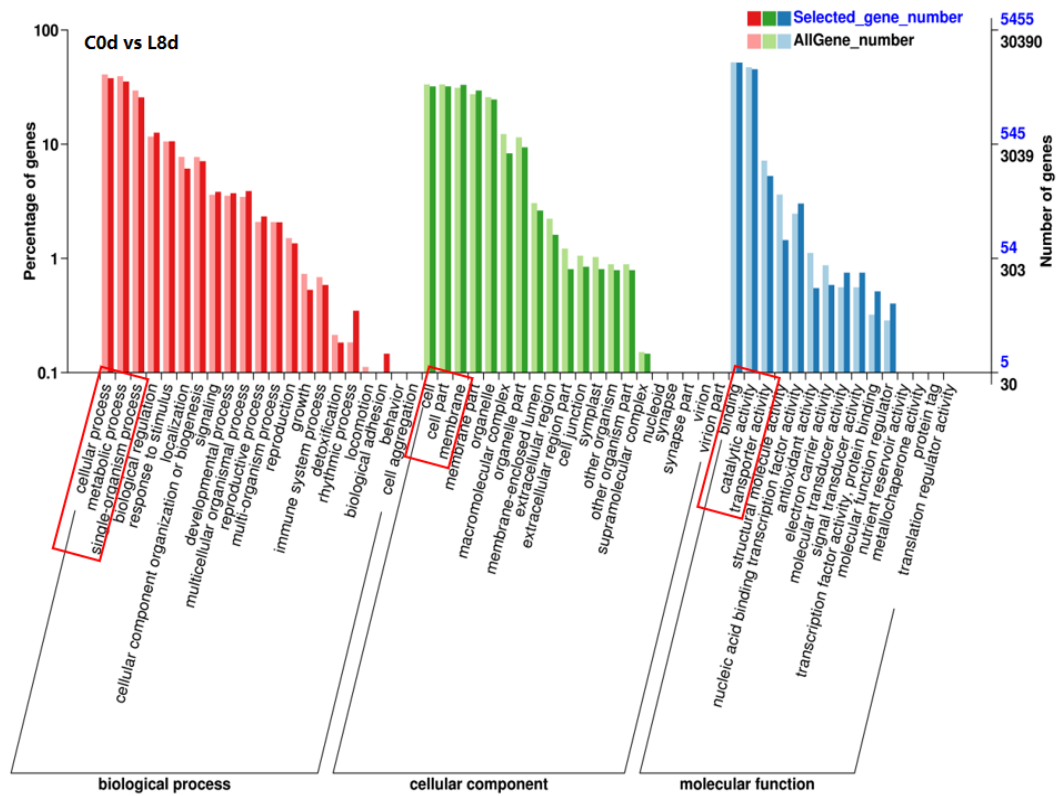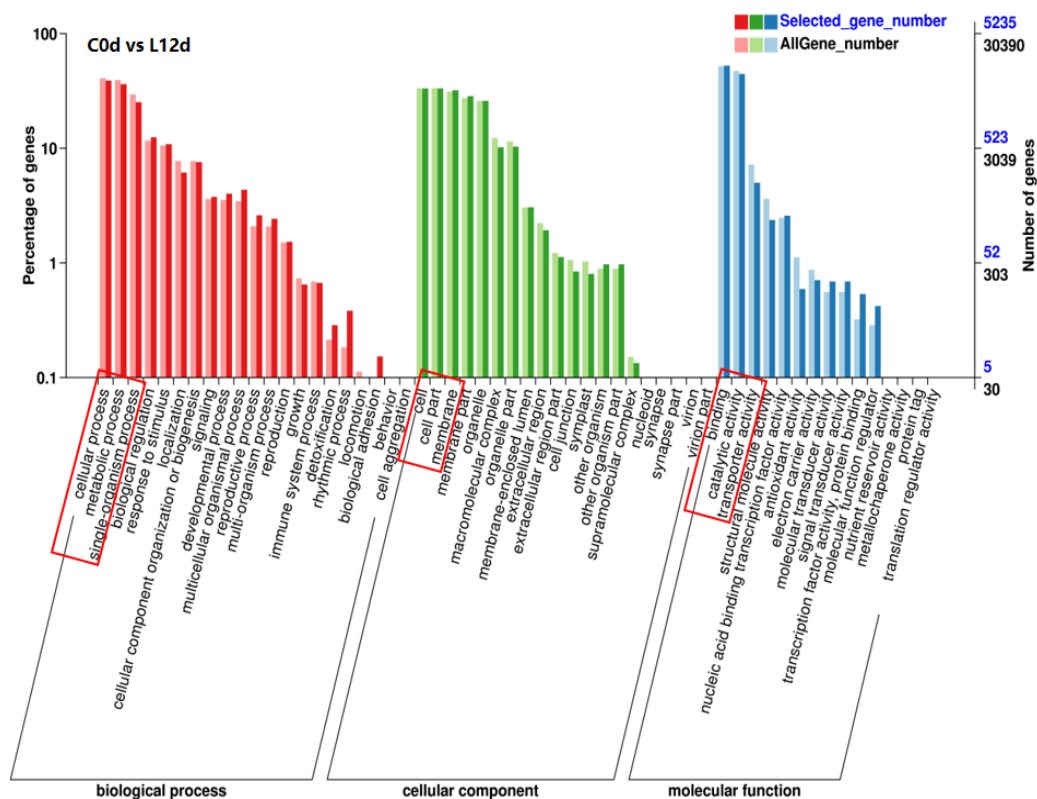

‘Huaizhi’ litchi trees were grown in a chamber at 22 °C/17 °C (day/night temperature, 12 h day and 12 h night) as normal temperature. Temperatures dropped from the normal one to 2 °C for 4 d, and then maintained at 2 °C for another 8 d. C 0 d, L 4 d, L 8 d, and L 12 d mean the leaves samples at 0 d, 4 d, 8 d, and 12 d of chilling stress.

**Figure S3 KEGG Pathway map: ascorbate and aldarate metabolism, glutathione metabolism, peroxisome, phenylpropanoid biosynthesis, pyruvate metabolism, plant hormone signal transduction.**

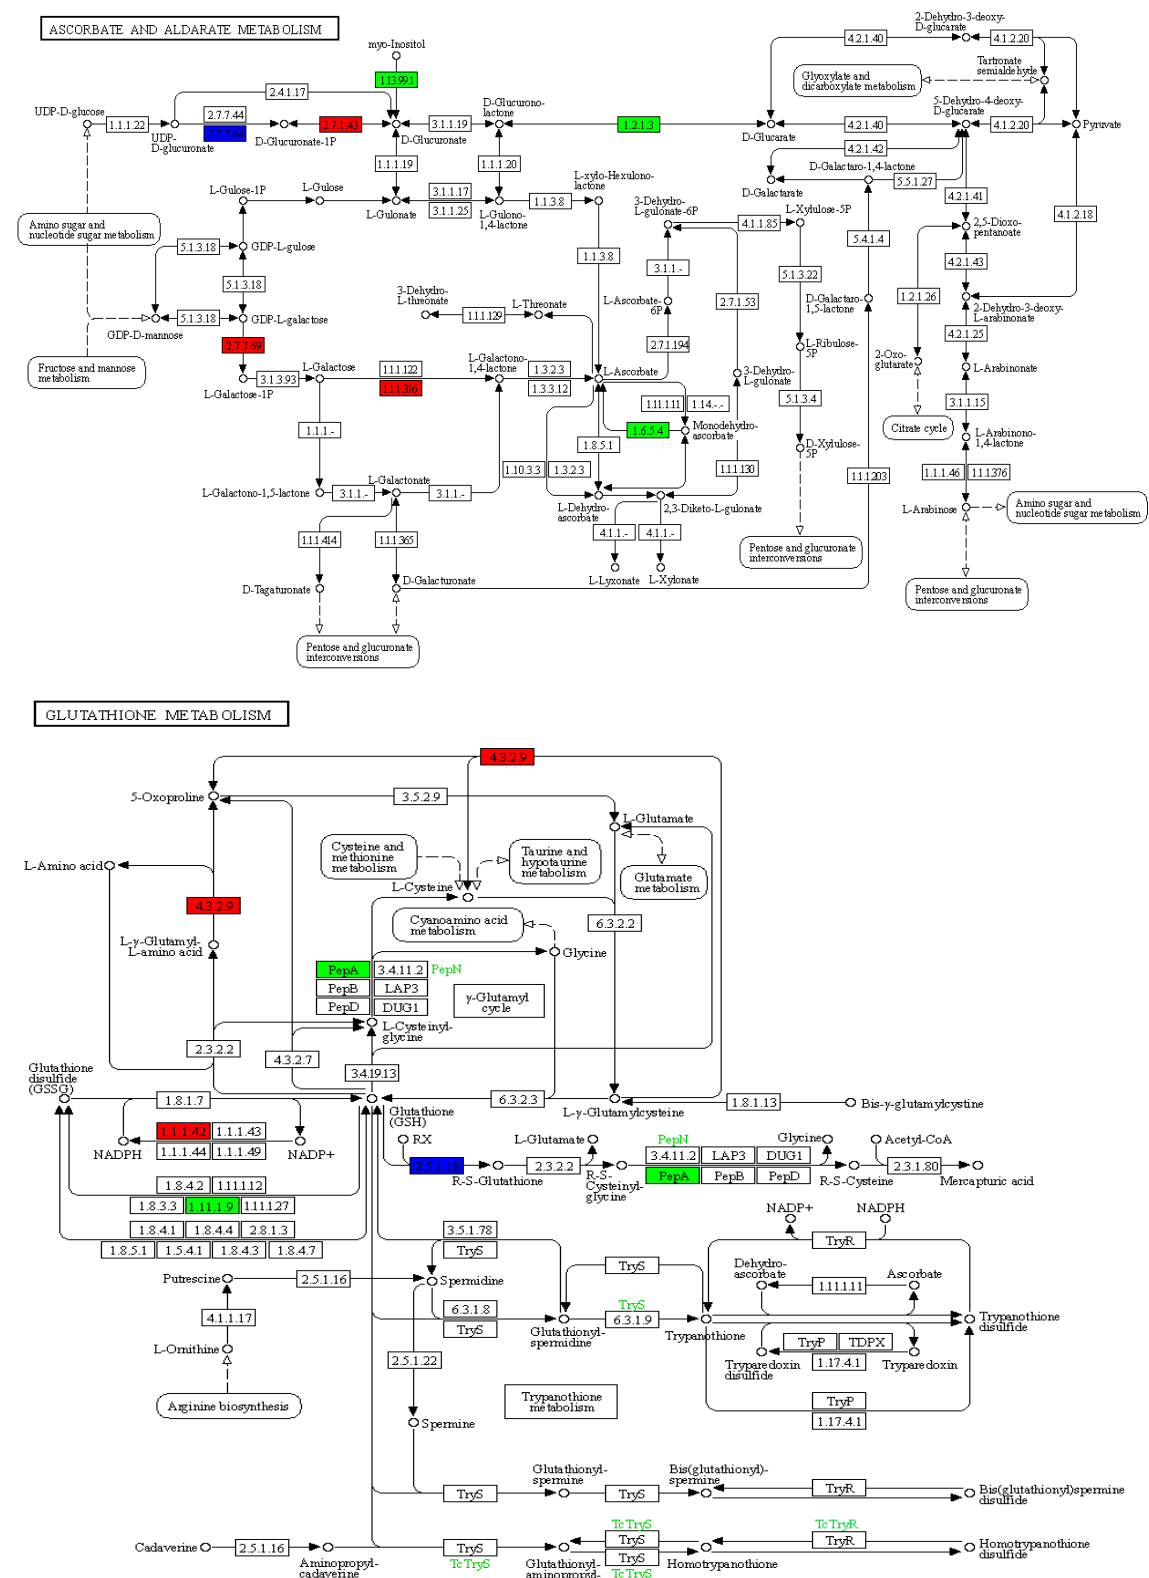

# PEROXISOME

## Peroxisome biogenesis

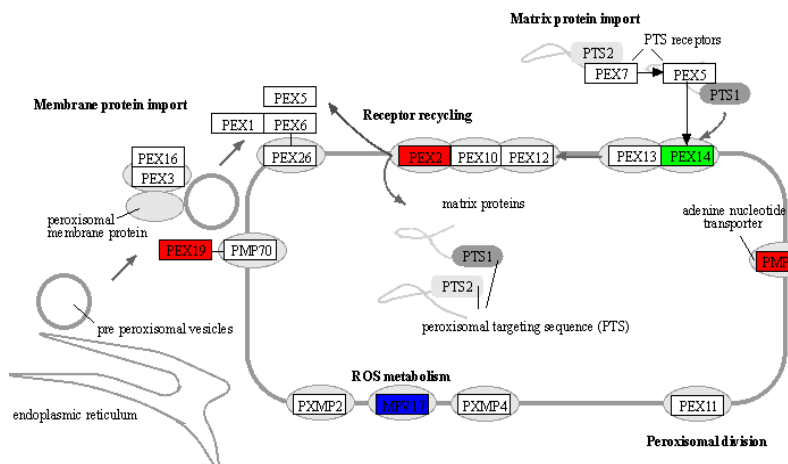

## Peroxisomal proteins

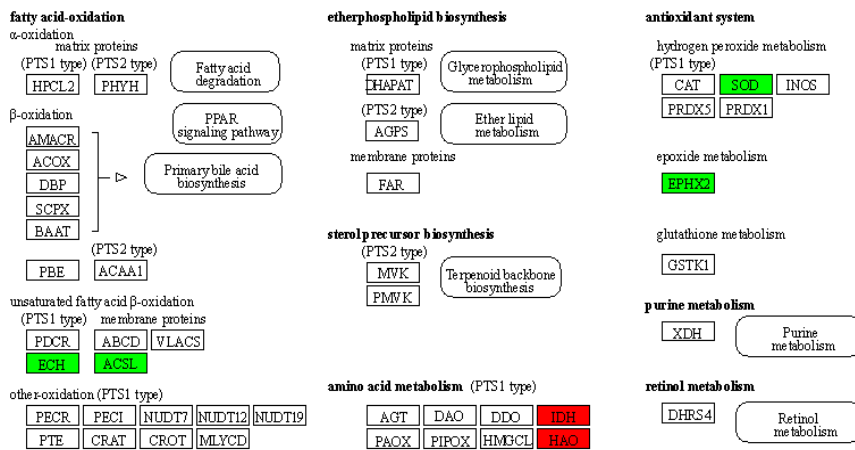

## PHENYLPROPANOID BIOSYNTHESIS

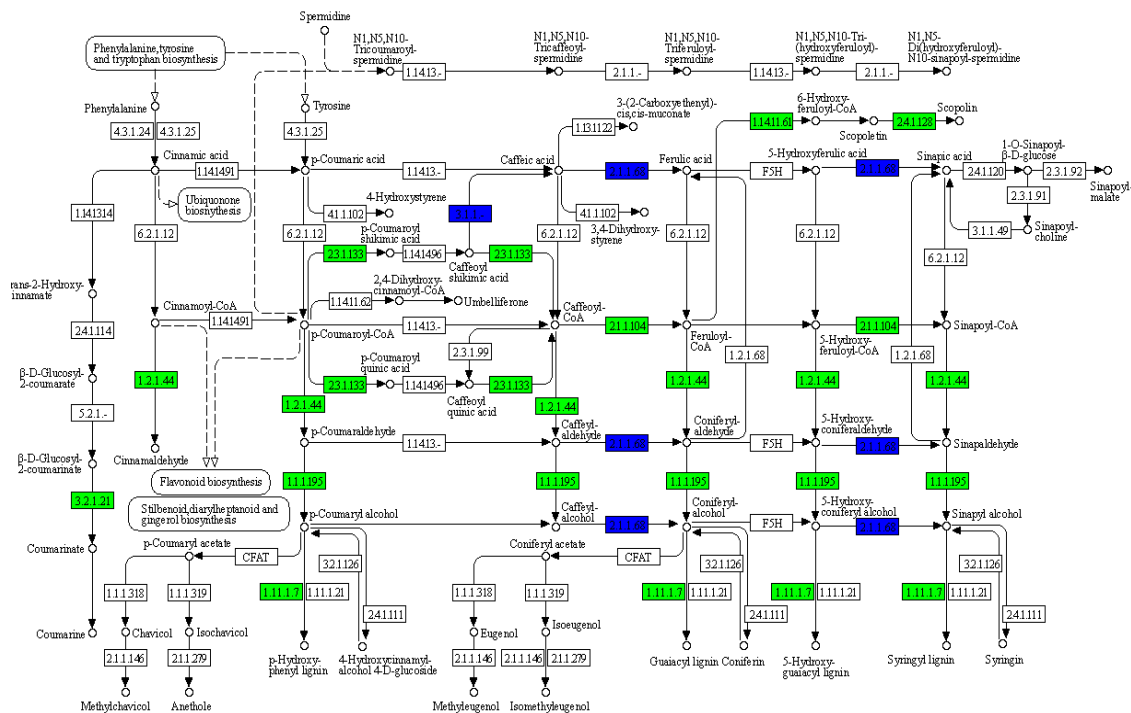



**Figure S4 Heat map diagram showing the expression profiles of DEGs identified from the four times during the low temperature stress.**

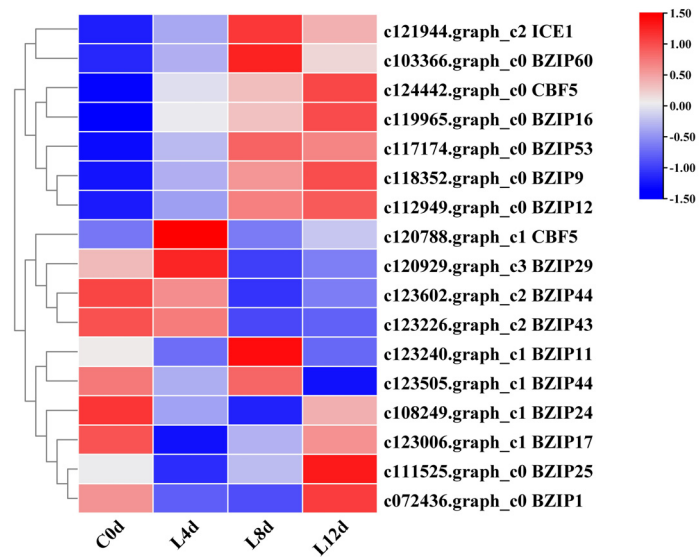

‘Huaizhi’ litchi trees were grown in a chamber at 22 °C/17 °C (day/night temperature, 12 h day and 12 h night) as normal temperature. Temperatures dropped from the normal one to 2 °C for 4 d, and then maintained at 2 °C for another 8 d. C 0 d, L 4 d, L 8 d, and L 12 d mean the leaves samples at 0 d, 4 d, 8 d, and 12 d of treatment. Fragments per kilobase of transcript per million mapped reads (FPKM) values were normalized to Z-score.
